# Supplementary material
Source: MDPI journal article supplement (https://www.mdpi.com/2073-4395/11/9/1877)
Supplement: s1 [file s1]

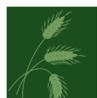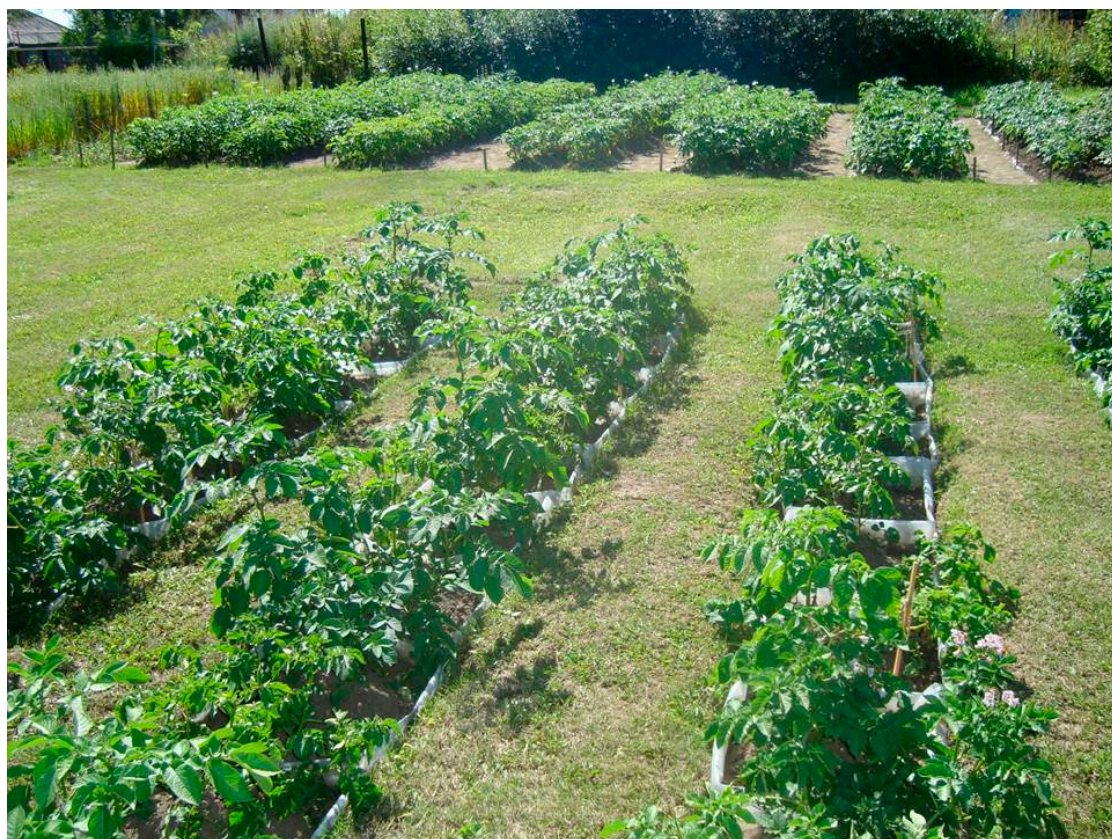

**Figure S1.** The general view of the microplot experiment site with potato fertilization on Phaeozem in the south of West Siberia in June, 2020.

2  
3
