# Supplementary material
Source: MDPI journal article supplement (https://www.mdpi.com/2073-4395/11/9/1877)
Supplement: s1 [file s1]

**Table S1.** Potato aboveground phytomass and tuber yield (g/m<sup>2</sup>, mean±s.d.) in some mineral fertilization variants in the microplot field experiment in the south of West Siberia

| Fertilization         | Year  |      |       |      |       |      |         |      |
|-----------------------|-------|------|-------|------|-------|------|---------|------|
|                       | 2018  |      | 2019  |      | 2020  |      | Average |      |
| Aboveground phytomass |       |      |       |      |       |      |         |      |
| No                    | 177 a | ±28  | 133 a | ±11  | 138 a | ±34  | 149 a   | ±32  |
| NP                    | 291 b | ±61  | 294 b | ±36  | 330 b | ±32  | 305 b   | ±46  |
| NPK1                  | 322 b | ±33  | 339 b | ±92  | 470 c | ±26  | 377 c   | ±87  |
| NPK2                  | 378 c | ±13  | 333 b | ±46  | 523 d | ±35  | 411 c   | ±90  |
| Tuber yield           |       |      |       |      |       |      |         |      |
| No                    | 534 a | ±55  | 442 a | ±53  | 339 a | ±87  | 438 a   | ±103 |
| NP                    | 716 b | ±138 | 564 a | ±156 | 491 b | ±100 | 590 b   | ±157 |
| NPK1                  | 868 b | ±194 | 805 b | ±204 | 723 c | ±46  | 799 c   | ±164 |
| NPK2                  | 919 c | ±48  | 831 b | ±109 | 763 c | ±70  | 838 c   | ±99  |

<sup>1</sup> Different letters indicate that the values in a column differ significantly at P≤0.05 level (Fisher's LSD test).
