# Supplementary material
Source: MDPI journal article supplement (https://www.mdpi.com/2073-4395/11/9/1877)
Supplement: s1 [file s1]

**Table S2.** Aboveground phytomass and tuber yield (both in g/plant, eq. to g /0.25 m<sup>2</sup>) of potatoes grown for three years in the microplot field experiment in the south of West Siberia: the data are shown for the levels of the interaction factor of K fertilization (FK) × Mg fertilization (FMg) × year

| Factor          | Factor levels |     |      | Aboveground phytomass |             | Tuber yield   |             |
|-----------------|---------------|-----|------|-----------------------|-------------|---------------|-------------|
|                 | FK            | FMg | year | Mean                  | ±S.D.       | Mean          | ±S.D.       |
| Total           |               |     |      | 393                   | ±94         | 810           | ±149        |
| FK × FMg × year | 1             | 0   | 2018 | <b>322 a</b>          | <b>±33</b>  | 868 a         | ±194        |
| FK × FMg × year | 1             | 0   | 2019 | <b>339 a</b>          | <b>±92</b>  | 805 a         | ±204        |
| FK × FMg × year | 1             | 0   | 2020 | <b>470 b</b>          | <b>±26</b>  | 723 a         | ±46         |
| FK × FMg × year | 1             | 1   | 2018 | <b>440 b</b>          | <b>±72</b>  | <b>1012 b</b> | <b>±206</b> |
| FK × FMg × year | 1             | 1   | 2019 | <b>323 a</b>          | <b>±79</b>  | <b>879 ab</b> | <b>±57</b>  |
| FK × FMg × year | 1             | 1   | 2020 | <b>484 b</b>          | <b>±15</b>  | <b>810 a</b>  | <b>±135</b> |
| FK × FMg × year | 1             | 2   | 2018 | <b>274 a</b>          | <b>±53</b>  | 776           | ±93         |
| FK × FMg × year | 1             | 2   | 2019 | <b>378 b</b>          | <b>±48</b>  | 774           | ±62         |
| FK × FMg × year | 1             | 2   | 2020 | <b>526 c</b>          | <b>±42</b>  | 698           | ±51         |
| FK × FMg × year | 2             | 0   | 2018 | <b>378 a</b>          | <b>±13</b>  | 919           | ±48         |
| FK × FMg × year | 2             | 0   | 2019 | <b>333 a</b>          | <b>±46</b>  | 831           | ±109        |
| FK × FMg × year | 2             | 0   | 2020 | <b>523 b</b>          | <b>±35</b>  | 763           | ±70         |
| FK × FMg × year | 2             | 1   | 2018 | <b>343 a</b>          | <b>±87</b>  | <b>933 b</b>  | <b>±122</b> |
| FK × FMg × year | 2             | 1   | 2019 | <b>335 a</b>          | <b>±56</b>  | <b>819 ab</b> | <b>±242</b> |
| FK × FMg × year | 2             | 1   | 2020 | <b>472 b</b>          | <b>±43</b>  | <b>762 a</b>  | <b>±50</b>  |
| FK × FMg × year | 2             | 2   | 2018 | <b>336 a</b>          | <b>±132</b> | 756           | ±242        |
| FK × FMg × year | 2             | 2   | 2019 | <b>331 a</b>          | <b>±31</b>  | 728           | ±113        |
| FK × FMg × year | 2             | 2   | 2020 | <b>464 b</b>          | <b>±24</b>  | 730           | ±121        |

<sup>1</sup> The differential values for factor levels are highlighted in bold; different letters indicate that the values in a column range (factors) differ significantly at P≤0.05 level (Fisher's LSD test).
